# Supplementary material for: A methodological study for the diagnosis of the SARS-Cov-2 infection in human serum with a macrocyclic sensor array
Source: Royal Society of Chemistry journal article supplement (doi:10.1039/d4sd00009a), 2024-01-01
Supplement: d4sd00009a1.pdf [file d4sd00009a1.pdf]

# **A methodology study toward the diagnostic of a SARS-Cov-2 infection in human serum with a macrocyclic based sensor array**

Monica Swetha Bosco<sup>1,2</sup>, Zeki Topcu<sup>4</sup>, Soumen Pradhan<sup>6,7</sup>, Ariadne Sossah<sup>1</sup>, Vassilis Tsatsaris<sup>1,3</sup>, Christelle  
Vauloup-Fellous<sup>5</sup>, Sarit S. Agasti<sup>6,7</sup>, Yves Rozenholc<sup>4\*</sup>, Nathalie Gagey-Eilstein<sup>1,2\*</sup>

<sup>1</sup>Université Paris Cité, INSERM UMR-S 1139, FHU PREMA, 4 avenue de l'observatoire, 75006 PARIS,  
France

<sup>2</sup>Université Paris Cité, CNRS, INSERM, UTCBS, 4 avenue de l'observatoire, 75006 PARIS, France

<sup>3</sup>Department of Obstetric, Cochin Hospital, AP-HP, Université Paris Cité, FHU PREMA, 123 Bd Port-Royal,  
75014 Paris, France.

<sup>4</sup>UR 7537, BioSTM, Université Paris Cité, 4 avenue de l'Observatoire, 75006 Paris, France.

<sup>5</sup> Université Paris-Saclay, INSERM U1193, Virology Laboratory, Hôpital Paul-Brousse, AP-HP, Villejuif,  
France

<sup>6</sup>New Chemistry Unit, Jawaharlal Nehru Centre for Advanced Scientific Research (JNCASR), Bangalore,  
Karnataka 560064, India.

<sup>7</sup>Chemistry & Physics of Materials Unit, Jawaharlal Nehru Centre for Advanced Scientific Research  
(JNCASR), Bangalore, Karnataka 560064, India.

Correspondance e-mail: *nathalie.eilstein@u-paris.fr*

\*These two authors contributed equally to the work.

## TABLE OF CONTENTS

### A. Clinical data

### B. Sensing Covid in clinical specimen

### A. Clinical data

**Table S1:** Detailed clinical informations for each samples

| N° sample | Covid status | Age | WG* | Days between symptoms and test | Breath symptoms | Hospitalization | Oxygen need | ICU |
|-----------|--------------|-----|-----|--------------------------------|-----------------|-----------------|-------------|-----|
| 1         | I            | 40  | 40  | 0                              | Y               | Y               | Y           | Y   |
| 2         | I            | 31  | 40  | 4                              | Y               | N               | N           | N   |
| 3         | I            | 37  | 35  | 5                              | Y               | N               | N           | N   |
| 4         | I            | 28  | 39  | 0                              | Y               | N               | N           | N   |
| 5         | I            | 31  | 40  | 1                              | Y               | N               | N           | N   |
| 6         | I            | 36  | 37  | 16                             | Y               | N               | N           | N   |
| 7         | I            | 31  | 29  | 16                             | N               | N               | N           | N   |
| 8         | I            | 32  | 28  | 11                             | Y               | N               | N           | N   |
| 9         | I            | 32  | 40  | 11                             | N               | N               | N           | N   |
| 10        | I            | 31  | 33  | 1                              | Y               | Y               | Y           | Y   |
| 11        | I            | 25  | 38  | 1                              | N               | N               | N           | N   |
| 12        | I            | 28  | 39  | 7                              | N               | N               | N           | N   |
| 1         | NI           | 39  | 40  |                                |                 |                 |             |     |
| 2         | NI           | 27  | 40  |                                |                 |                 |             |     |
| 3         | NI           | 19  | 40  |                                |                 |                 |             |     |
| 4         | NI           | 30  | 38  |                                |                 |                 |             |     |
| 5         | NI           | 37  | 38  |                                |                 |                 |             |     |
| 6         | NI           | 31  | 38  |                                |                 | N.A             |             |     |
| 7         | NI           | 30  | 39  |                                |                 |                 |             |     |
| 8         | NI           | 42  | 38  |                                |                 |                 |             |     |
| 9         | NI           | 38  | 39  |                                |                 |                 |             |     |
| 10        | NI           | 31  | 41  |                                |                 |                 |             |     |

|    |    |    |    |
|----|----|----|----|
| 11 | NI | 44 | 36 |
| 12 | NI | 26 | 36 |
| 13 | NI | 23 | 28 |
| 14 | NI | 43 | 33 |

\*WK = Week of Gestation

## B. Sensing Covid in clinical specimen

**Table S2:** Excitation and emission wavelengths used for each CB[7]-FL.

| FL in CB[7]-FL  | $\lambda_{\text{excitation}}$ (nm) | $\lambda_{\text{emission}}$ (nm) |
|-----------------|------------------------------------|----------------------------------|
| Bodipy          | 500                                | 515                              |
| Coumarin        | 418                                | 433                              |
| Cyanine 3       | 515                                | 560                              |
| Cyanine 5       | 630                                | 650                              |
| Fluorescein     | 500                                | 515                              |
| Silicorhodamine | 645                                | 660                              |
| TAMRA           | 554                                | 574                              |

**Figure S1:** Effect of complex matrix on fluorescence of CB[7]-FL. Variation in the fluorescence emission spectra of a/ CB[7]-BDP b/ CB[7]-TMR after addition of proteins in serum matrix (1.6 mg/mL) and control (serum only). c/ Histogram of the fluorescence emission at  $\lambda_{em\ max}$  of CB-BDP, CB-TMR, CB-Cy3, CB-Cy5, CB-Cou and CB-SiR, in presence of serum before or after addition of proteins (BSA, pepsin and lysozyme) at 1.6 mg/mL. \* indicate significant differences ( $p$ -value < 0.05)

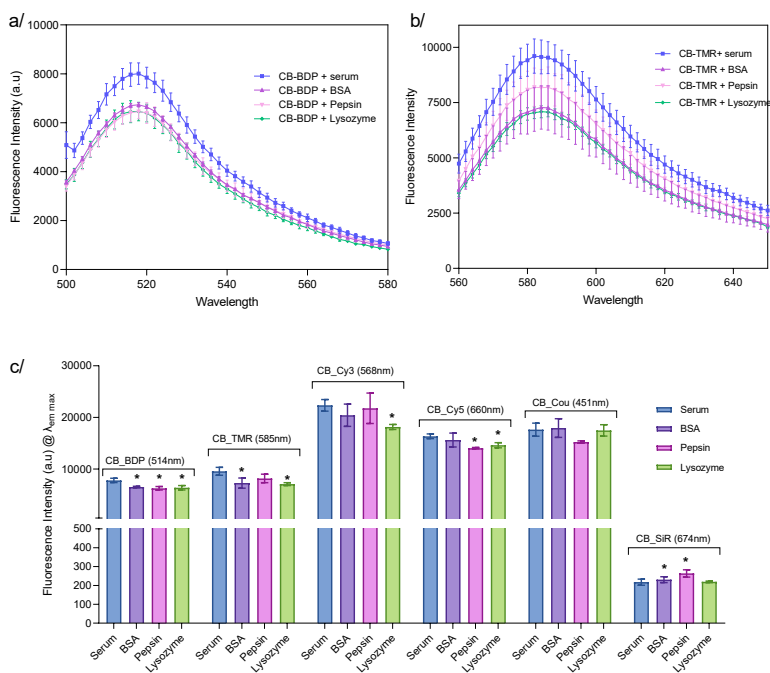

**Figure S2:** Stability of the fluorescence signals with different CB-[FL] during the 30 min of measurements

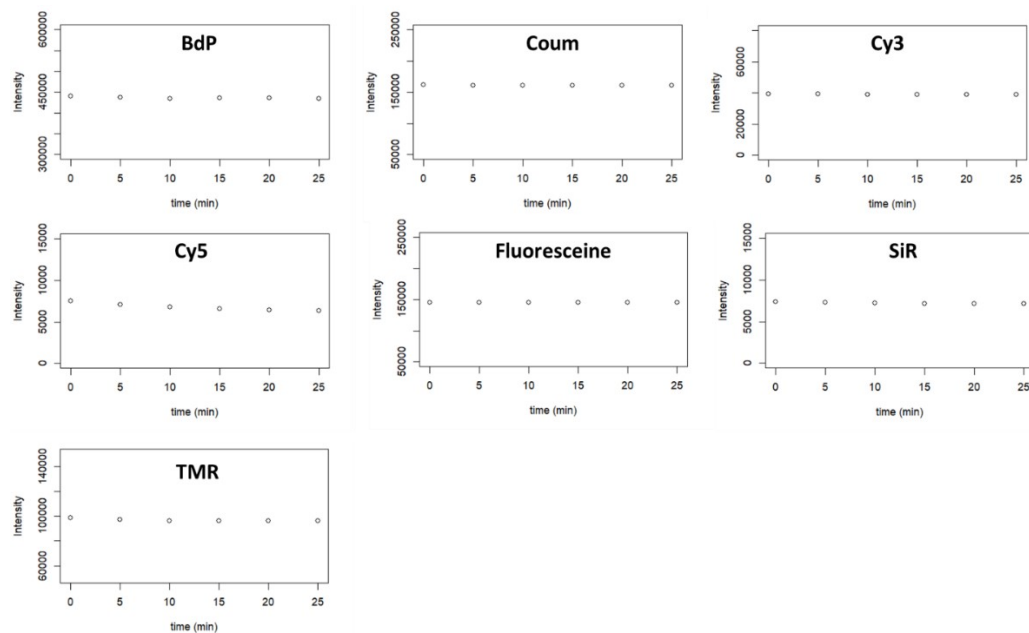

**Figure S3:** Microplates organization – 1+, 2+, 3+, 4+, 5+, 6+, 7+, 8+, 9+, 10+, 11+, 12+ are Covid+ samples and 1-, 2-, 3-, 4-, 5-, 6-, 7-, 8-, 9-, 10-, 11-, 12-, 13-, 14- are control samples. Black positions in B11 to E11 are CB[7]-FL with PBS only instead of serum.

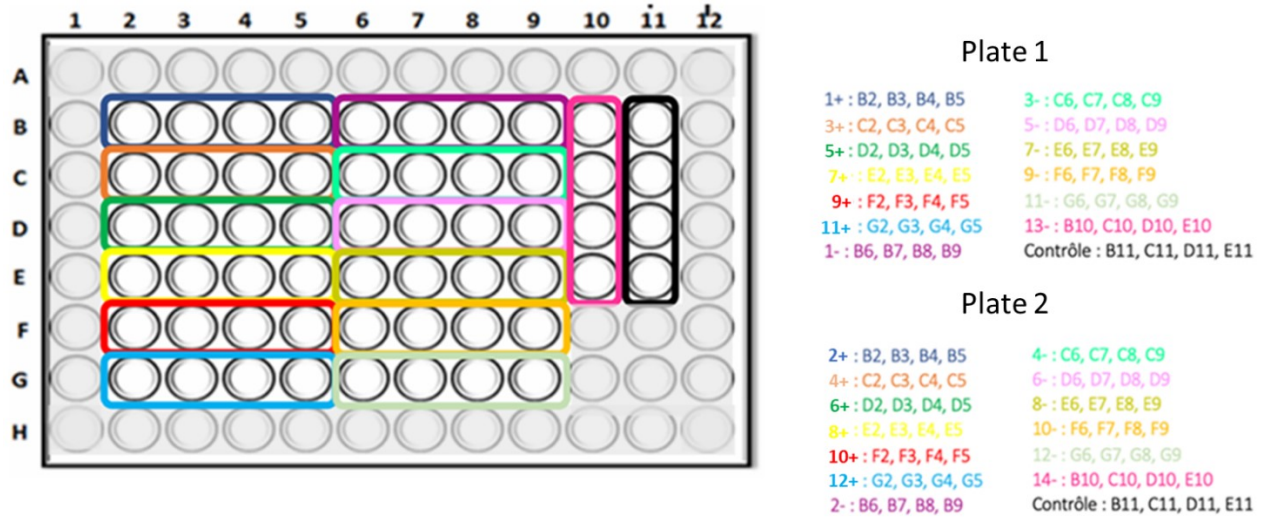

**Table S3:** Data of Fluorescence modulation,  $\Delta I$ , of CB-FLs against serum samples (**1:** Sars-Cov2 infected serum samples, **2:** control serum samples)

| Sample | Covid status | BdP        | Coum       | Cy3       | Cy5      | Fluor      | SiR       | TMR       |
|--------|--------------|------------|------------|-----------|----------|------------|-----------|-----------|
| 1+     | 1            | -100977,38 | -37362,04  | 34368,25  | -1088,58 | 27325,33   | -6286,17  | -26557,79 |
| 3+     | 1            | -335107,08 | -159768,08 | 29186,13  | -1722,71 | -106612,13 | -6319,00  | -88688,42 |
| 5+     | 1            | -68893,33  | -92973,00  | 45036,42  | -1596,04 | 87689,71   | -6640,63  | -23434,75 |
| 7+     | 1            | -133037,46 | -101560,67 | 17072,88  | -1464,50 | -60315,75  | -6412,75  | -29726,63 |
| 9+     | 1            | -203599,00 | -104554,63 | 8662,88   | -1840,08 | -72260,67  | -5843,04  | -26606,33 |
| 11+    | 1            | -185874,92 | -113050,88 | 9921,58   | -1672,29 | -70588,13  | -5735,38  | -30772,83 |
| 1-     | -1           | -196079,15 | -99345,79  | 16444,75  | -2039,04 | -49643,17  | -7106,19  | -27855,54 |
| 3-     | -1           | -128953,67 | -92031,04  | 18264,88  | -2251,75 | -45384,92  | -7304,50  | -28776,29 |
| 5-     | -1           | -140275,71 | -96240,96  | 23421,25  | -1820,58 | -14528,46  | -6886,79  | -24953,93 |
| 7-     | -1           | -184890,71 | -90600,38  | 13964,49  | -2043,92 | -69207,21  | -6803,79  | -20248,42 |
| 9-     | -1           | -247232,75 | -122156,88 | 7224,63   | -2107,33 | -77408,54  | -6136,54  | -27620,29 |
| 11-    | -1           | -145756,29 | -89371,08  | 14840,13  | -2010,71 | -54077,79  | -6547,71  | -21355,75 |
| 13-    | -1           | -168824,88 | -89789,21  | 14415,50  | -1868,29 | -48213,00  | -6823,21  | -25259,67 |
| 2+     | 1            | -96936,25  | -110928,13 | 14218,38  | -2052,71 | 3529,75    | -10645,21 | -33003,96 |
| 4+     | 1            | -75001,71  | -88250,88  | 16230,75  | -2226,08 | -11588,71  | -10648,71 | -30618,96 |
| 6+     | 1            | -135989,33 | -140846,13 | 2282,37   | -2508,29 | -46848,88  | -11085,13 | -51040,96 |
| 8+     | 1            | -104084,04 | -90749,29  | -148,21   | -2690,08 | -48809,88  | -10669,42 | -33807,46 |
| 10+    | 1            | -173953,54 | -150597,96 | 3774,75   | -2693,25 | -82865,58  | -10146,21 | -60229,29 |
| 12+    | 1            | -134602,83 | -115489,79 | 4471,17   | -2173,54 | -55977,00  | -10245,50 | -31619,71 |
| 2-     | -1           | -187206,58 | -165789,67 | -13957,38 | -3575,56 | -62294,42  | -11550,54 | -81514,96 |
| 4-     | -1           | -142263,46 | -116576,04 | -674,58   | -3144,54 | -59988,67  | -11617,00 | -36797,79 |
| 6-     | -1           | -103875,36 | -112677,75 | 19119,21  | -3051,79 | -10778,67  | -11148,29 | -33746,67 |
| 8-     | -1           | -121953,79 | -110793,17 | 7781,37   | -3065,58 | -36462,13  | -11212,58 | -33059,08 |
| 10-    | -1           | -54591,83  | -92565,33  | 21856,67  | -3088,04 | 36676,96   | -10803,67 | -28357,79 |
| 12-    | -1           | -140930,46 | -112764,13 | -678,58   | -3033,33 | -63730,25  | -10807,67 | -35957,21 |
| 14-    | -1           | -139832,83 | -131591,54 | 7531,50   | -2963,92 | -43370,96  | -11263,08 | -32212,75 |

**Figure S4:** Fluorescence modulation after addition of serum in each well. Covid+ samples are on the left, Control sample on the middle and control well on the right.

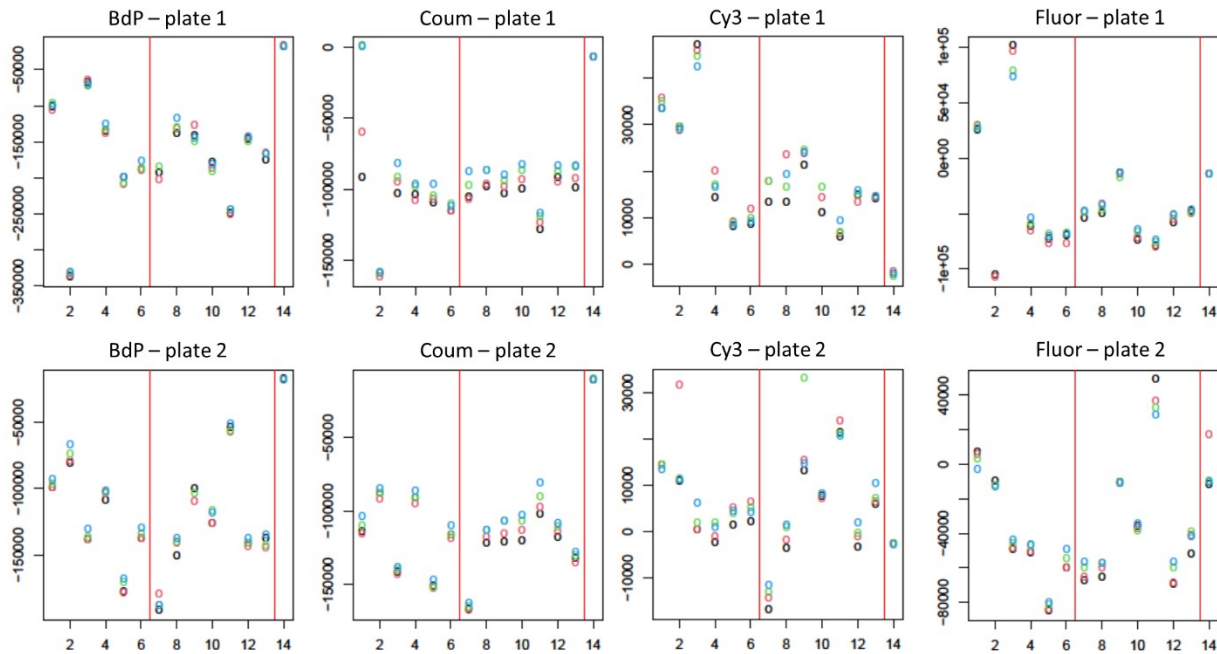

**Figure S5:** Stabilization of the error rates for the random forest on all the variables (a) and only on the important variables, Cy5 and SiR (b)

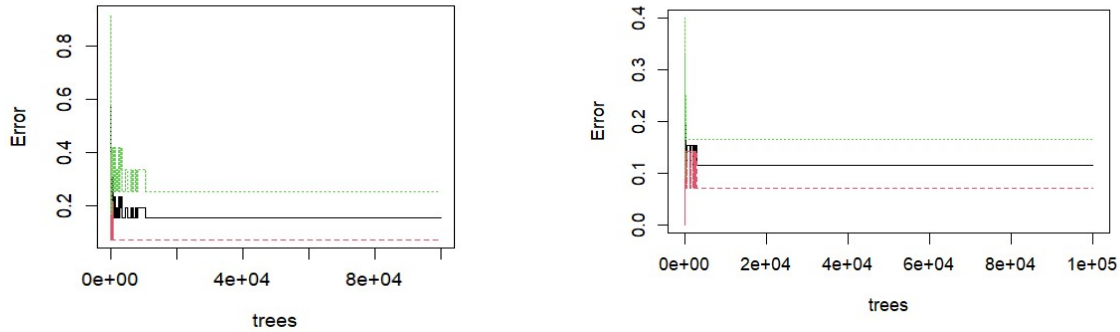

**Table S4:** Data of Fluorescence modulation,  $\Delta I$ , of CB-FLs against serum samples (P: Pregnant (2 combined datasets), NP: Non pregnant, Covid: Sars-Cov2 infected serum samples)

|   | CB_Cy5    | CB_Bdp     | CB_SiR     | CB_TMR    | CB_Cy3     | CB_Coum    |
|---|-----------|------------|------------|-----------|------------|------------|
| P | -3446,389 | -187206,58 | -11550,542 | -81514,96 | -13957,375 | -165789,67 |
| P | -3144,542 | -142263,46 | -11617     | -36797,79 | -674,5833  | -116576,04 |
| P | -3051,792 | -104629,06 | -11148,292 | -33746,67 | 19119,2083 | -112677,75 |
| P | -3065,583 | -121953,79 | -11212,583 | -33059,08 | 7781,375   | -110793,17 |
| P | -3088,042 | -54591,83  | -10803,667 | -28357,79 | 21856,6667 | -92565,33  |
| P | -3033,333 | -140930,46 | -10807,667 | -35957,21 | -678,5833  | -112764,12 |
| P | -2963,917 | -139832,83 | -11263,083 | -32212,75 | 7531,5     | -131591,54 |
| P | -2039,042 | -193913,33 | -7026,778  | -27855,54 | 16352,1111 | -99345,79  |
| P | -2251,75  | -128953,67 | -7304,5    | -28776,29 | 18264,875  | -92031,04  |
| P | -1820,583 | -140275,71 | -6886,792  | -24953,92 | 23421,25   | -96240,96  |
| P | -2043,917 | -184890,71 | -6803,792  | -20248,42 | 14094,1667 | -90600,38  |
| P | -2107,333 | -247232,75 | -6136,542  | -27620,29 | 7224,625   | 122156,88  |
| P | -2010,708 | -145756,29 | -6547,708  | -21355,75 | 14840,125  | -89371,08  |
| P | -1868,292 | -168824,88 | -6823,208  | -25259,67 | 14415,5    | -89789,21  |
| P | 1690,06   | -88540,52  | -5319,65   | -8902,73  | 32807,21   | -52670,48  |
| P | 1525,73   | -85174,19  | -5827,48   | -10058,06 | 34345,21   | -59142,98  |
| P | 1543,4    | -77320,19  | -6016,65   | -8264,9   | 34334,38   | -57700,98  |
| P | 1678,23   | -73041,52  | -5907,81   | -5588,56  | 35764,04   | -53545,81  |
| P | 1516,06   | -74916,19  | -6016,81   | -8062,4   | 34382,38   | -56137,65  |
| P | 1664,23   | -90913,69  | -5774,48   | -7884,73  | 32524,71   | -52595,65  |
| P | 1626,06   | -67777,19  | -5828,31   | -9456,06  | 37104,38   | -46513,98  |
| P | 1694,23   | -77103,02  | -6039,98   | -9610,9   | 32856,21   | -45789,65  |
| P | 1638,56   | -68564,52  | -6225,81   | -10059,73 | 40317,88   | -46861,98  |
| P | 1821,73   | -63000,19  | -6324,65   | -9297,23  | 36709,38   | -46239,48  |
| P | 1653,4    | -68675,19  | -6608,65   | -9320,06  | 34823,38   | -45587,65  |
| P | 1820,23   | -72750,02  | -6123,15   | -9089,73  | 36033,04   | -44187,31  |
| P | 1685,06   | -95091,69  | -6108,65   | -7551,4   | 39311,04   | -50310,81  |
| P | 1719,4    | -92602,35  | -6180,98   | -8938,23  | 38436,38   | -53123,31  |
| P | 1695,9    | -91944,85  | -6410,81   | -7931,23  | 39311,38   | -52402,98  |
| P | 1603,23   | -94356,19  | -6442,98   | -7990,9   | 39081,54   | -52295,81  |
| P | 1719,23   | -96028,35  | -6719,31   | -7742,23  | 39747,21   | -50034,31  |
| P | 1824,56   | -88318,52  | -6539,98   | -7524,23  | 39579,38   | -51266,81  |
| P | 1638,06   | -93054,85  | -6579,31   | -8051,4   | 38059,21   | -52160,81  |
| P | 1735,9    | -98695,02  | -6543,48   | -8264,9   | 40313,88   | -54326,31  |
| P | 1725,06   | -96420,52  | -6796,15   | -7756,4   | 41745,54   | -54301,65  |
| P | 1839,9    | -92472,35  | -6877,65   | -7556,73  | 41340,38   | -53055,15  |
| P | 1926,73   | -95547,85  | -6739,81   | -7609,06  | 40231,54   | -52496,81  |
| P | 1809,73   | -102659,02 | -6559,48   | -7050,9   | 40872,88   | -50680,15  |
| P | 1883,73   | -102128,02 | -6475,65   | -8007,9   | 36731,38   | -65553,48  |
| P | 1967,4    | -105015,69 | -6945,48   | -8148,9   | 37092,21   | -69410,81  |
| P | 1952,9    | -98213,02  | -6901,48   | -8637,06  | 39244,21   | -64575,15  |
| P | 1865,06   | -98316,69  | -6790,65   | -10028,73 | 36665,38   | -66733,98  |
| P | 1940,9    | -104259,85 | -6792,65   | -8346,06  | 38603,21   | -66893,31  |

|       |           |            |            |           |            |            |
|-------|-----------|------------|------------|-----------|------------|------------|
| P     | 1986,4    | -96352,35  | -6371,15   | -8262,23  | 38085,04   | -65476,15  |
| P     | 2852,6    | -86423,44  | -4708,81   | -13964,25 | 24509,75   | -54130,4   |
| P     | 2806,44   | -86354,94  | -4810,15   | -13986,75 | 28210,75   | -54654,4   |
| P     | 2707,77   | -86210,94  | -4803,65   | -13551,25 | 22747,92   | -53321,4   |
| P     | 2738,6    | -86888,6   | -4756,31   | -13707,58 | 22496,08   | -53053,56  |
| P     | 2780,1    | -86822,44  | -4764,65   | -13038,92 | 23144,08   | -52723,23  |
| P     | 2808,44   | -84545,6   | -4764,98   | -13831,25 | 22237,25   | -53559,23  |
| P     | 2775,94   | -75756,6   | -5163,98   | -5608,75  | 42138,75   | -31130,9   |
| P     | 3218,6    | -75496,44  | -5320,48   | -6188,92  | 46812,42   | -32529,23  |
| P     | 3286,6    | -77256,6   | -5553,98   | -5756,92  | 38543,92   | -30847,23  |
| P     | 4042,77   | -78086,1   | -5198,98   | -5715,75  | 39119,25   | -31317,4   |
| P     | 4090,77   | -79526,77  | -5503,65   | -6332,58  | 41220,75   | -32222,56  |
| P     | 3306,27   | -78002,27  | -5033,81   | -5949,08  | 36943,92   | -30601,73  |
| NP    | 1863,06   | -132815,69 | -6410,15   | -7433,56  | 38167,54   | -59593,81  |
| NP    | 1711,23   | -125201,02 | -6701,65   | -8707,4   | 38356,54   | -59085,31  |
| NP    | 1886,06   | -130831,02 | -6763,98   | -8596,73  | 38317,88   | -59245,98  |
| NP    | 1747,4    | -125199,52 | -6847,81   | -7313,4   | 36398,71   | -60088,48  |
| NP    | 1989,73   | -131704,69 | -6839,81   | -7156,23  | 38962,38   | -57306,81  |
| NP    | 1885,73   | -131921,02 | -6710,65   | -6876,73  | 41057,88   | -58338,98  |
| NP    | 1964,4    | -120134,85 | -6626,65   | -15123,4  | 24781,71   | -76338,31  |
| NP    | 1792,56   | -120444,02 | -6770,81   | -15315,4  | 25153,21   | -78879,65  |
| NP    | 1949,4    | -125060,52 | -7287,65   | -14868,06 | 24917,71   | -80286,65  |
| NP    | 2031,23   | -119649,02 | -6635,31   | -15919,06 | 30390,54   | -80713,65  |
| NP    | 2047,4    | -122046,19 | -6998,48   | -15043,23 | 28651,38   | -77786,48  |
| NP    | 1910,73   | -118153,52 | -7327,31   | -14571,73 | 30095,21   | -78445,48  |
| NP    | 1931,4    | -162399,19 | -4454,65   | -6509,06  | 40340,38   | -73221,48  |
| NP    | 1881,56   | -178452,35 | -4645,65   | -7782,56  | 41036,21   | -75121,15  |
| NP    | 1827,73   | -164926,52 | -4803,15   | -7622,73  | 41667,54   | -76412,98  |
| NP    | 1855,73   | -173629,69 | -4776,15   | -7657,9   | 41996,88   | -74895,15  |
| NP    | 1889,4    | -166619,19 | -4669,15   | -6716,73  | 54340,71   | -72779,98  |
| NP    | 1917,73   | -149115,35 | -4863,65   | -6902,9   | 42758,21   | -75225,31  |
| NP    | 2244,4    | -132602,02 | -4441,48   | -10666,9  | 54362,54   | -65376,81  |
| NP    | 2128,23   | -124045,35 | -4683,31   | -12516,06 | 61515,54   | -67507,31  |
| NP    | 2312,56   | -122827,02 | -4781,98   | -11967,9  | 48499,71   | -66178,98  |
| NP    | 2175,9    | -123014,69 | -4877,98   | -11959,4  | 41833,04   | -66063,98  |
| NP    | 2090,73   | -123506,69 | -4784,65   | -12788,73 | 40323,04   | -64876,48  |
| NP    | 2347,73   | -120813,02 | -4733,31   | -11226,73 | 38655,88   | -63284,31  |
| NP    | 2128,73   | -157387,85 | -4472,31   | -10704,23 | 45957,04   | -67993,98  |
| NP    | 2132,73   | -155890,52 | -4859,65   | -10197,9  | 44088,38   | -66203,15  |
| NP    | 2069,23   | -147190,19 | -4761,98   | -10349,9  | 40534,71   | -64789,15  |
| NP    | 2166,73   | -145353,19 | -4892,31   | -11381,4  | 39208,71   | -64387,81  |
| NP    | 1998,56   | -131797,69 | -5149,15   | -11420,06 | 38016,71   | -65861,81  |
| NP    | 2161,56   | -120526,02 | -4667,65   | -11264,73 | 36441,21   | -62606,81  |
| NP    | 2498,44   | -105088,77 | -8875,98   | -7632,92  | 46298,42   | -46085,9   |
| NP    | 3000,77   | -102449,1  | -8994,81   | -7468,92  | 43131,25   | -46287,23  |
| NP    | 2133,77   | -101896,94 | -8792,15   | -8336,92  | 36052,08   | -48313,23  |
| NP    | 2073,44   | -105028,44 | -8905,81   | -7039,75  | 43603,25   | -47071,4   |
| NP    | 2884,94   | -102947,6  | -8882,31   | -7446,42  | 38290,75   | -44894,06  |
| NP    | 3259,44   | -103547,6  | -8788,15   | -6952,75  | 36692,75   | -45425,73  |
| NP    | 2947,27   | -119070,27 | -4643,65   | -6228,25  | 51104,58   | -62738,23  |
| NP    | 3719,77   | -121121,1  | -4696,65   | -6441,42  | 47888,08   | -61390,56  |
| NP    | 3003,27   | -119983,77 | -4811,48   | -6591,08  | 45047,42   | -58682,73  |
| NP    | 2703,44   | -119158,44 | -4588,65   | -6180,42  | 48608,25   | -58685,9   |
| NP    | 3009,27   | -119665,94 | -4431,48   | -5429,75  | 39946,58   | -56622,9   |
| NP    | 3855,77   | -117609,44 | -4790,31   | -6017,92  | 40124,08   | -66290,9   |
| NP    | 4967,1    | -129962,1  | -4687,31   | -11029,08 | 43143,58   | -51114,9   |
| NP    | 5111,6    | -127439,1  | -4442,31   | -10623,08 | 42798,75   | -50427,4   |
| NP    | 4487,44   | -129477,6  | -4635,15   | -10932,92 | 42302,42   | -51303,73  |
| NP    | 4198,94   | -129285,27 | -4813,31   | -11291,42 | 35822,42   | -50653,9   |
| NP    | 5128,6    | -128218,44 | -4603,15   | -9688,92  | 39779,42   | -51592,23  |
| NP    | 4369,94   | -125100,77 | -4354,48   | -9077,25  | 48471,58   | -50071,9   |
| Covid | -1088,583 | -100977,38 | -6286,167  | -24584,42 | 34368,25   | -37362,04  |
| Covid | -1722,708 | -335107,08 | -6319      | -88688,42 | 34368,25   | -159768,08 |
| Covid | -1596,042 | -68893,33  | -6640,625  | -23434,75 | 45036,4167 | -92973     |
| Covid | -1464,5   | -133037,46 | -6412,75   | -29726,62 | 17072,875  | -101560,67 |
| Covid | -1840,083 | -203599    | -5843,042  | -26606,33 | 8662,875   | -104554,62 |
| Covid | -1672,292 | -185874,92 | -5735,375  | -30772,83 | 9921,5833  | -113050,88 |
| Covid | -2052,708 | -96936,25  | -10645,208 | -33003,96 | 14218,375  | -110928,12 |
| Covid | -2226,083 | -75001,71  | -10648,708 | -30618,96 | 16230,75   | -88250,88  |
| Covid | -2508,292 | -135989,33 | -11085,125 | -51040,96 | 2282,375   | -140846,12 |
| Covid | -2690,083 | -104084,04 | -10669,417 | -33807,46 | -148,2083  | -90749,29  |



|       |           |            |            |           |           |            |
|-------|-----------|------------|------------|-----------|-----------|------------|
| Covid | -2693,25  | -173953,54 | -10146,208 | -60229,29 | 3774,75   | -150597,96 |
| Covid | -2173,542 | -134602,83 | -10245,5   | -31619,71 | 4471,1667 | -115489,79 |

**Figure S6:** Discrimination of Pregnant (P) Non-pregnant (NP) and Sars-COV-2 pregnant (Sars-COV-2 P) clinical samples from two sets of experiments. a/ Explanation of the different cohorts and combination b/ Confusion matrix for discrimination of P and NP with the random forest analysis using the whole variables. c/ Confusion matrix for discrimination of P, NP and Sars-COV-2 P with the random forest analysis using the whole variables and the most important variables.

a/

| Cohort 1 | Cohort 2        | Combined cohort |
|----------|-----------------|-----------------|
| 48 NP    |                 | 42 NP           |
| 42 P     | 14 P            | 56 P+P          |
|          | 12 Sars-Cov-2 P | 12 Sars-Cov-2 P |

b/

| OOB estimate of error rate : 2.9 % |    |    |
|------------------------------------|----|----|
|                                    | P  | NP |
| P                                  | 54 | 2  |
| NP                                 | 1  | 47 |

c/

|              | ALL - OOB estimate of error rate : 12.1 % |    |              | Cy5, Bdp, SiR, TMR, Cy3<br>OOB estimate of error rate : 6.9 % |    |              |
|--------------|-------------------------------------------|----|--------------|---------------------------------------------------------------|----|--------------|
|              | P                                         | NP | P Sars-COV-2 | P                                                             | NP | P Sars-COV-2 |
| P            | 51                                        | 2  | 3            | 52                                                            | 2  | 2            |
| NP           | 1                                         | 47 | 0            | 1                                                             | 47 | 0            |
| P Sars-COV-2 | 4                                         | 0  | 8            | 3                                                             | 0  | 9            |

**Figure S7:** LDA models for the 2-group “control versus covid” model. The histogram is marked with normal distributions fitted to the full data consisting of average of replicates for each serum sample. The box-plot depicts the max/min of canonical scores obtained from the LDA.

a.

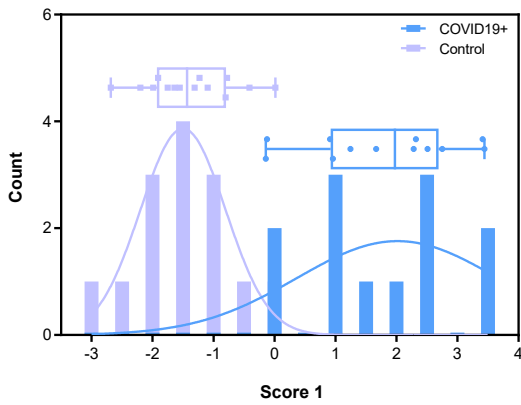

b.

|            | Control | Covid | %error |
|------------|---------|-------|--------|
| <b>85%</b> |         |       |        |
| Control    | 13      | 1     | 7      |
| Covid      | 2       | 10    | 16.6   |

| <i>Random attribution</i> |         |       |          |
|---------------------------|---------|-------|----------|
|                           | Control | Covid | %correct |
| <b>58%</b>                |         |       |          |
| Control                   | 5       | 9     | 64       |
| Covid                     | 5       | 7     | 42       |

**Figure S8:** Diagnosis of Covid-19 samples based on serum response toward the CB[7]-FL sensor array. A/ Box plot of the first canonical score of the training (70% of the samples) and test set (30% of the samples). The horizontal line in the boxes represents the median and the bottom and top of the boxes represent the 25th and 75th percentiles, respectively. B/ ROC curves for the array-based sensor in patients with Covid-19 (Co) compared with control (Cont). (Co) is for normal data and (Co) is for scrambled data.

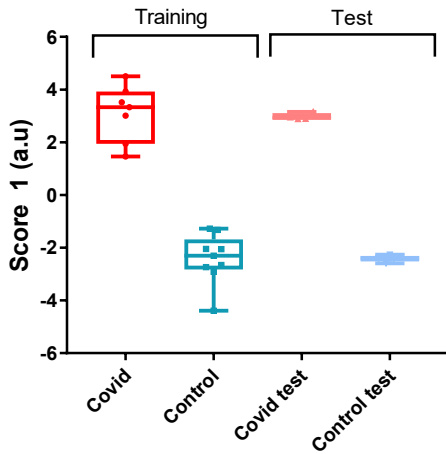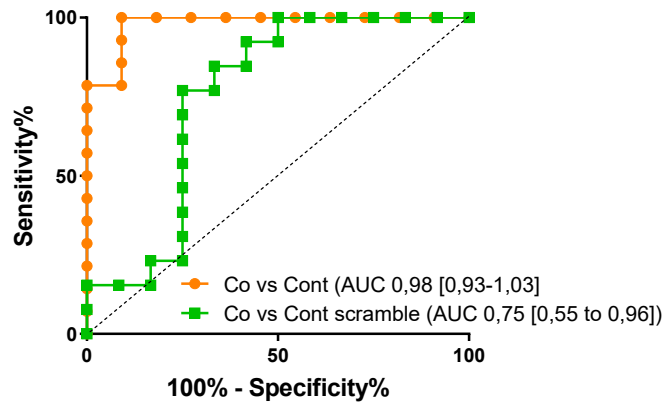

## Annex 1 : R-code for the data extraction

### ❖ Lecture-raw-data

```
rows.letters = LETTERS[2:7] # B,C,D,...,G
cols.info = 3:12
n.rows = length(rows.letters)
n.cols = 10
n.cycles = 6

raw.folder = './Raw Data Covid'
out.folder = './Table Data Covid'
ref.folder = './Ref Data Covid'

if (!dir.exists(out.folder)) dir.create(out.folder)
if (!dir.exists(ref.folder)) dir.create(ref.folder)

list.dir = dir(raw.folder,all.files=F,recursive=F,full.names=T)

for (name in list.dir) { # read directory content
  out.name = gsub(raw.folder,out.folder,name) # directory for output
  if (!dir.exists(out.name)) dir.create(out.name)

  list.file = list.files(path=name,pattern="*.csv",full.names=T)

  for (file in list.file) { # read each file
    print(paste('processing of',file))
    X = read.csv(file, header=F, blank.lines.skip=FALSE, stringsAsFactors=FALSE)
    if (dim(X)[2]==1) X = read.csv(file, header=F, blank.lines.skip=FALSE, stringsAsFactors=FALSE, sep=';')
    IntensityArray = array(0,dim=c(n.rows,n.cols,n.cycles),dimnames=list(rows.letters,1+(1:n.cols),1:n.cycles))
    i = tps = 1
    for (line in 1:dim(X)[1]) { # read line by line the file
      champs = X[line,] # get the contents of the line
      # print(champs[1])
      if (!(champs[1] %in% rows.letters)) next() # forget non intensity line
      # here we are on intensity line
      intensities = as.numeric(champs[cols.info])
      # print(intensities)
      IntensityArray[i,,tps] = intensities
      i = i+1

      if (champs[1]==rows.letters[n.rows]) {i=1; tps=tps+1}
      if (tps==n.cycles+1) break() # too many cycles read // stop
    }

    if (grepl('Coum',file)) print(IntensityArray)

    save(IntensityArray,file=gsup(raw.folder,out.folder,gsup('.csv','rda',file)))

    if (grepl('Cy3',file)) { # we deal with NA's on experiment 2569 Cy3 (1) I1
      print(file)
      ref.name = gsub(raw.folder,ref.folder,name) # directory for output
      if (!dir.exists(ref.name)) dir.create(ref.name)
      founded = FALSE
      while (!founded) {
        line = line+1
        old.champs = champs
        champs = X[line,]
        if (length(old.champs)<=9 | length(champs)<=9) next()
        founded = ((old.champs[9]=='Wavelength') & (as.numeric(champs[9])==560))
      }

      line = line+6
      Ref560Array = array(0,dim=c(n.rows,n.cols),dimnames=list(rows.letters,1+(1:n.cols)))
      i = 1
      for (l in line:(line+5)) {
        champs = X[l,]
        intensities = as.numeric(champs[cols.info])
        Ref560Array[i,] = intensities
        i = i+1
      }

      save(Ref560Array,file=gsup(raw.folder,ref.folder,gsup('.csv','ref560.rda',file)))
    } } }
```

### ❖ read-plate-data.R

```
the.method = 'Fatio'

plate2table = function(plate) {
  # print(plate)
```

```

table = rbind(plate[1:6,1:4], plate[1:6,4+(1:4)], plate[1:4,9], plate[1:4,10])
rownames(table) = c(LETTERS[1:13],0)
colnames(table) = 1:4
# print(table)
table
}

# directory des fichiers .rda
in.folder = '../Table Data Covid'

# directory des fichiers resultats
out.folder = sub('Table','Treated',in.folder)

if (!dir.exists(out.folder)) dir.create(out.folder)

list.dir = dir(in.folder,all.files=F,recursive=T,full.names=T)
list.I0 = grep('I0.rda',dir(in.folder,all.files=F,recursive=T,full.names=T), value=T)
list.I1 = grep('I1.rda',dir(in.folder,all.files=F,recursive=T,full.names=T), value=T)

for (name in list.I1)
{ # read directory content

  load(name)

  # get name of output sub-folder and create it if not existing
  in.sub.folder = substr(name,grepexpr('/',name)[[1]][2],grepexpr('/',name)[[1]][3])
  out.sub.folder = paste0(out.folder,in.sub.folder)
  fluo = gsub('/','',in.sub.folder); fluo = gsub(' ','',fluo)
  print(fluo)

  if (!dir.exists(out.sub.folder)) dir.create(out.sub.folder)

  MeanIntensityArray = apply(IntensityArray,1:2,mean,na.rm=TRUE,trim=0.1)

  IntensityTable = array(dim=c(14,4,dim(IntensityArray)[3]))
  for (i in 1:dim(IntensityArray)[3]) IntensityTable[,i] = plate2table(IntensityArray[,i])

  # Reorganize in a table instead of a plate // 4 values per line // control is the last line
  I = plate2table(MeanIntensityArray)

  bool = apply(I,1,function(l) all(is.nan(l))) # check for line made only of NaN
  if (any(bool)) {
    ref = sub('.rda',' ref560.rda',sub('Table','Ref',name))
    print(paste('use',ref))
    load(ref)
    I[bool,] = plate2table(Ref560Array)[bool,] # get line from ref
  }

  I.mean = rowMeans(I,na.rm=T) # mean over replicates

  # we deal with changes in the plate numbering from I1 to I0 in order to find I0 name
  last.barre = rev(gregexec('/',name)[[1]][1,])[1]
  end.name = substring(name,last.barre)
  next.white = gregexec(' ',end.name)[[1]][1,][1]
  end.name = substring(end.name,next.white+1)
  new.end = sub('I1','I0',end.name)

  # Do same for the associated control plate
  name.I0 = grep(new.end,list.I0,fixed=T,value=T)
  load(name.I0)
  MeanIntensityArray = apply(IntensityArray,1:2,mean,na.rm=TRUE,trim=0.1) # variance 1/6 - If only NA's create NaN
  IntensityTable0 = array(dim=c(14,4,dim(IntensityArray)[3]))
  for (i in 1:dim(IntensityArray)[3]) IntensityTable0[,i] = plate2table(IntensityArray[,i])
  I0 = plate2table(MeanIntensityArray)
  I0.mean = rowMeans(I0,na.rm=T) # mean over replicates

  out.name = paste0(out.sub.folder,substring(name,grepexpr('/',name)[[1]][3]+1))
  out.name = gsub('.rda',paste0('-',the.method,'.rda'),out.name)
  if (the.method=='Eatio') {
    Eatio.all = I - I0.mean
    Eatio.mean = I.mean - I0.mean
    Eatio.sd = apply(Eatio.all,1,sd,na.rm=T)
  }
  use.all = eval(parse(text=paste(the.method,'all',sep='.')))
  use.mean = eval(parse(text=paste(the.method,'mean',sep='.')))
  use.sd = eval(parse(text=paste(the.method,'sd',sep='.')))
  covid.status = as.factor(c(rep(1,l=6),rep(-1,l=7))) # 6 first are covid+

  save(fluo, I, I0, use.all,use.mean,use.sd, covid.status, file=out.name)

}

```

## ❖ build-data.R

```

the.method = 'Eatio'

# directory des fichiers .rda
in.folder = '../Treated Data Covid'

# directory des fichiers resultats
out.folder = sub('Treated','Tree',in.folder)
if (!dir.exists(out.folder)) dir.create(out.folder)

list.dir = dir(in.folder,all.files=F,recursive=T,full.names=T,pattern = paste0('*-',the.method,'.rda'))

```

```

sample1 = sample2 = fluo1 = fluo2 = NULL
for (name in list.dir) { # read directory content
  print(name)
  tmp = load(name)
  if (grepl('(1)',name,fixed=T)) {
    sample1 = cbind(sample1,use.mean[names(use.mean)!='0'])
    fluo1 = c(fluo1,fluo)
    covid1 = covid.status
  } else {
    sample2 = cbind(sample2,use.mean[names(use.mean)!='0'])
    fluo2 = c(fluo2,fluo)
    covid2 = covid.status
  }
}
samples = rbind(sample1[,order(fluo1)],sample2[,order(fluo2)])
colnames(samples) = fluo1[order(fluo1)]
covid.status = c(covid1,covid2)
rownames(samples) = covid.status

save(samples,covid.status,file=paste0(out.folder,'/',the.method,'-covid-19-fluo-data.rda'))

```

## Annex 2: R-code for the data analysis

```

library('randomForest')
library('FactoMineR')
library('plotly')
library('MASS')
library('plot3D')
library('ggplot2')
library('e1071')
library('caTools')
library('caret')
library('factoextra')

the.method = 'Eatio'

#Preparing the data
load(paste0('../Tree Data Covid/',the.method,'-covid-19-fluo-data.rda'))
n.data = dim(samples)[1]
the.data <- data.frame(covid.status, samples)

#### RANDOM FORESTS OOB ####
tree.full = randomForest(covid.status~., data=samples, ntree=50000, mtry=2, importance=T, proximity=T)
tree.full

importance(tree.full)
plot(tree.full)
legend('right',col=c(3,2,1),pch=16,legend = c('OOB','Covid -', 'Covid +'))
varImpPlot(tree.full)

tree.ok = randomForest(covid.status~Cy5+SiR, data=samples, ntree=50000, importance=T)
tree.ok
importance(tree.ok)
plot(tree.ok)
legend('right',col=c(3,2,1),pch=16,legend = c('OOB','Covid -', 'Covid +'))
varImpPlot(tree.ok)

#### LDA using LOCV ####
the.data <- data.frame(samples)
mLDA <- lda(covid.status~., data=the.data, CV=F)
mLDA
plot(mLDA)
mean(mLDA!=the.data$covid.status)

```
